# Supplementary material for: Controlling the Oxygen Defects Concentration in a Pure BiFeO3 Bulk Ceramic
Source: MDPI journal article supplement (doi:10.3390/ma15196509), 2022-09-20
Supplement: s1 [file s1]

## Supplementary materials

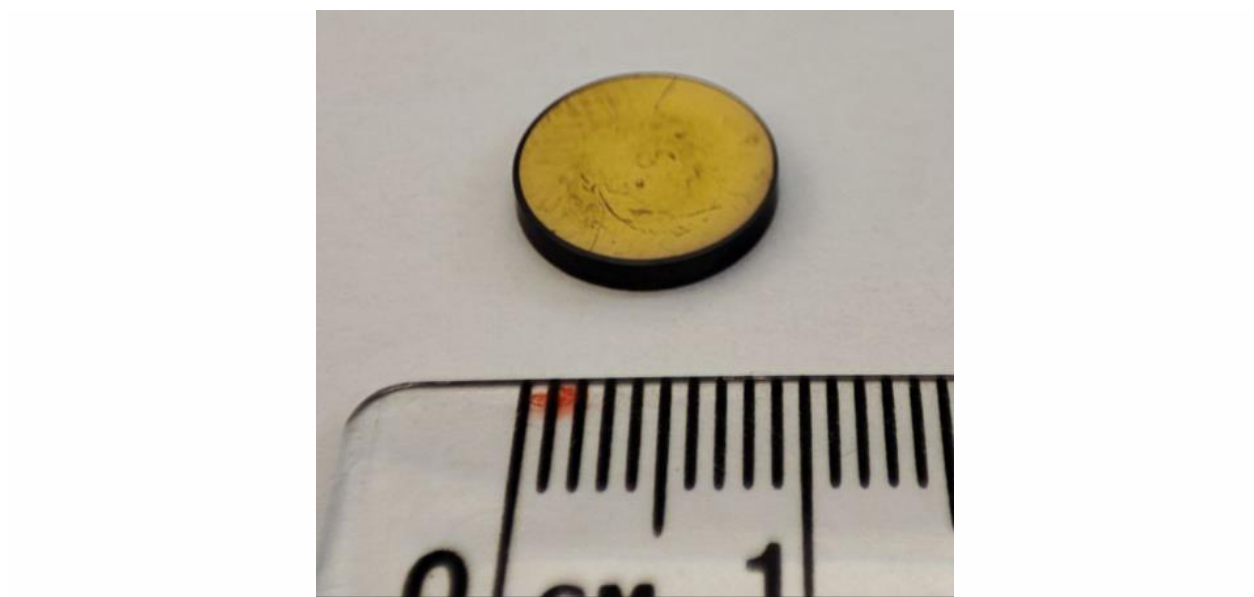

Figure S1 – Photo of the sample after electrical measurement with gold electrodes

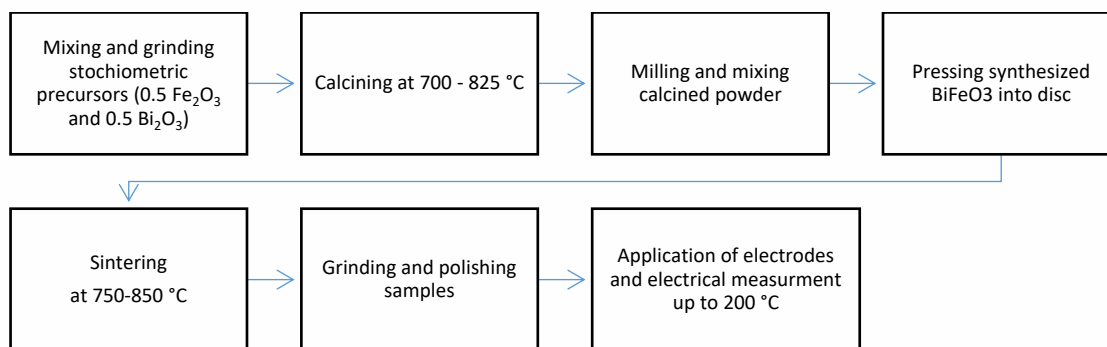

Figure S2 – Block diagram of the synthesis and sintering of BiFeO<sub>3</sub> and its subsequent analysis to optimize the preparation process

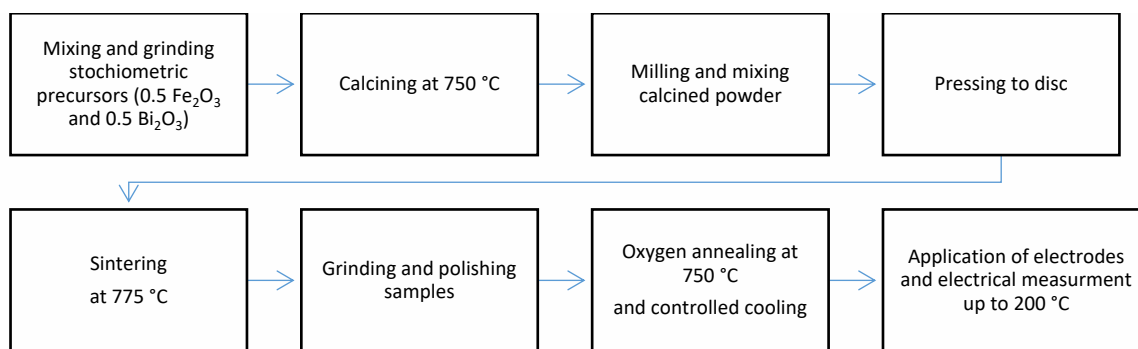

Figure S3 – Block diagram of the synthesis and sintering of bismuth ferrite and subsequent annealing, to study the effect of oxygen defects on conductivity
